# Supplementary material
Source: PubMed Central journal article supplement (PMC2988667)

## ASCO Erythropoiesis Stimulating Agent Orders and Flow Sheet for Adult Patients with Cancer

### COVER SHEET

Note: The FDA-approved package inserts (the “labels”) limit the indication for use of Erythropoiesis Stimulating Agents (ESAs) in patients with cancer and anemia to those being treated with chemotherapy for palliation, and excludes those undergoing chemotherapy with curative intent. In addition, the FDA has mandated a Risk Evaluation and Mitigation Strategy (REMS) for all ESAs:

<http://www.fda.gov/Drugs/DrugSafety/PostmarketDrugSafetyInformationforPatientsandProviders/ucm200297.htm>

Before using this flowsheet, please complete the following items from the REMS:

- Verify that the health care provider has enrolled in the ESA APPRISE program and completed all of its requirements
- Sign the Health Professional Acknowledgment form
- Have the patient sign the Patient Acknowledgement form
- Provide the patient with the ESA Medication Guide

# Erythropoiesis Stimulating Agent Orders and Flow Sheet – For Adult Patients with Cancer

Boxed Warnings : "ESAs shortened overall survival and/or increased the risk of tumor progression or recurrence in some clinical studies in patients with breast, non-small cell lung, head and neck, lymphoid, and cervical cancers."

FDA required patient/healthcare professional acknowledgment form signed (see cover sheet for this form)  Patient  Healthcare professional

**CONTRAINDICATIONS – WARNING:** if patient has contraindications to ESAs do not administer or use only with extreme caution - \*use caution †Do not use

- Patient has previous history of thromboembolic events\*
- Just about to have or recently has had surgery (perioperative)\*
- Anemia of cancer not receiving concurrent chemotherapy†
- Prolonged periods of immobilization or limited activity\*
- Patient has multiple myeloma and is receiving thalidomide or lenalidomide\*
- Patient with myeloma, NHL or CLL not receiving concurrent chemotherapy†

Patient Name: \_\_\_\_\_ DOB/MRN: \_\_\_\_\_ Age: \_\_\_\_\_ Weight: \_\_\_\_\_

Diagnosis: \_\_\_\_\_ Regimen: \_\_\_\_\_

Pre-treatment Labs: Hemoglobin or Hematocrit: \_\_\_\_\_ g/dL Initial Iron: \_\_\_\_\_ Date: \_\_\_\_\_

**INITIAL ANEMIA SYMPTOMS:** \_\_\_\_\_

**PURPOSE OF CHEMOTHERAPY:**  palliative – ESAs not indicated when chemotherapy is for curative intent

**JUSTIFICATION FOR USE:**

- Hemoglobin concentration has fallen below 10 g/dL
- Patient has low-risk myelodysplasia
- No contraindications
- Patient has chemotherapy-associated anemia
- Other causes of anemia considered
- Patient without contraindications wants to avoid transfusion and accept risk of ESAs

**LABORATORY VALUES**

|                             | Date | Result | Date | Result | Date | Result |
|-----------------------------|------|--------|------|--------|------|--------|
| Iron                        |      |        |      |        |      |        |
| Total iron-binding capacity |      |        |      |        |      |        |
| Transferrin saturation %    |      |        |      |        |      |        |
| Ferritin                    |      |        |      |        |      |        |

**PLAN:**

| Cycle # | Day of cycle | Date given | Dose ordered | MD Initials | Dose given | Site | RN/NP Initials |
|---------|--------------|------------|--------------|-------------|------------|------|----------------|
|         |              |            |              |             |            |      |                |
|         |              |            |              |             |            |      |                |
|         |              |            |              |             |            |      |                |
|         |              |            |              |             |            |      |                |

**ESA DOSING\*** [\*based on 2/16/2010 FDA-approved labels]

**Epoetin**

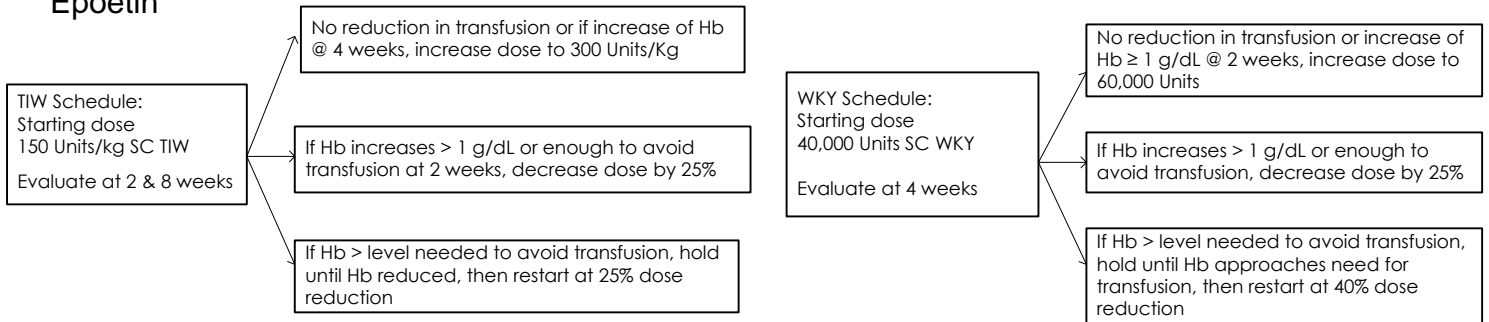

**Darbepoetin**

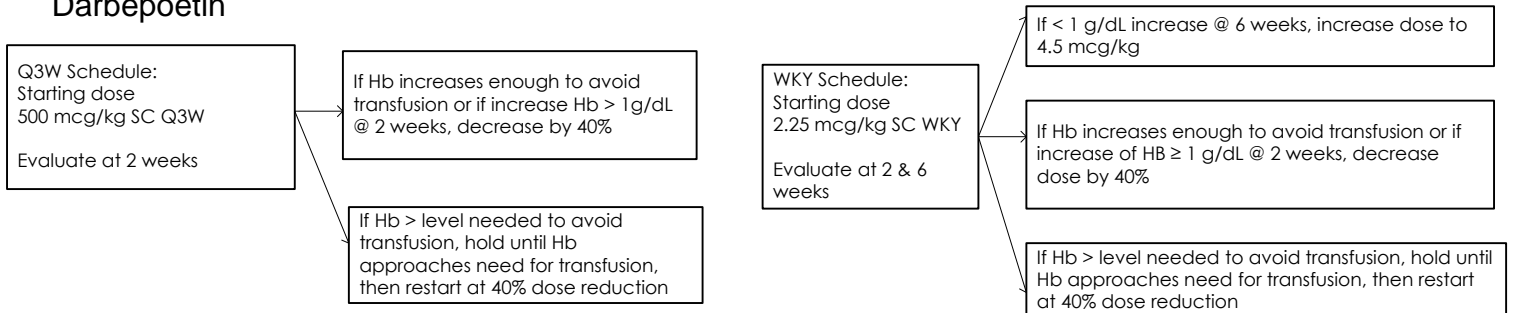

Supplement: supp_6.6.317_ESA_2010_Flowsheet.pdf [file supp_6.6.317_ESA_2010_Flowsheet.pdf]
