# Supplementary material
Source: PubMed Central journal article supplement (PMC2988667)
Supplement: supp_6.6.317_ESA_2010_Update_Algorithm.pdf [file supp_6.6.317_ESA_2010_Update_Algorithm.pdf]

# ASCO 2010 ALGORITHM - ESAs FOR CHEMOTHERAPY-INDUCED ANEMIA

n.b.: Can consider using ESAs for people with low-risk MDS. Follow recommended cautions and dosing.

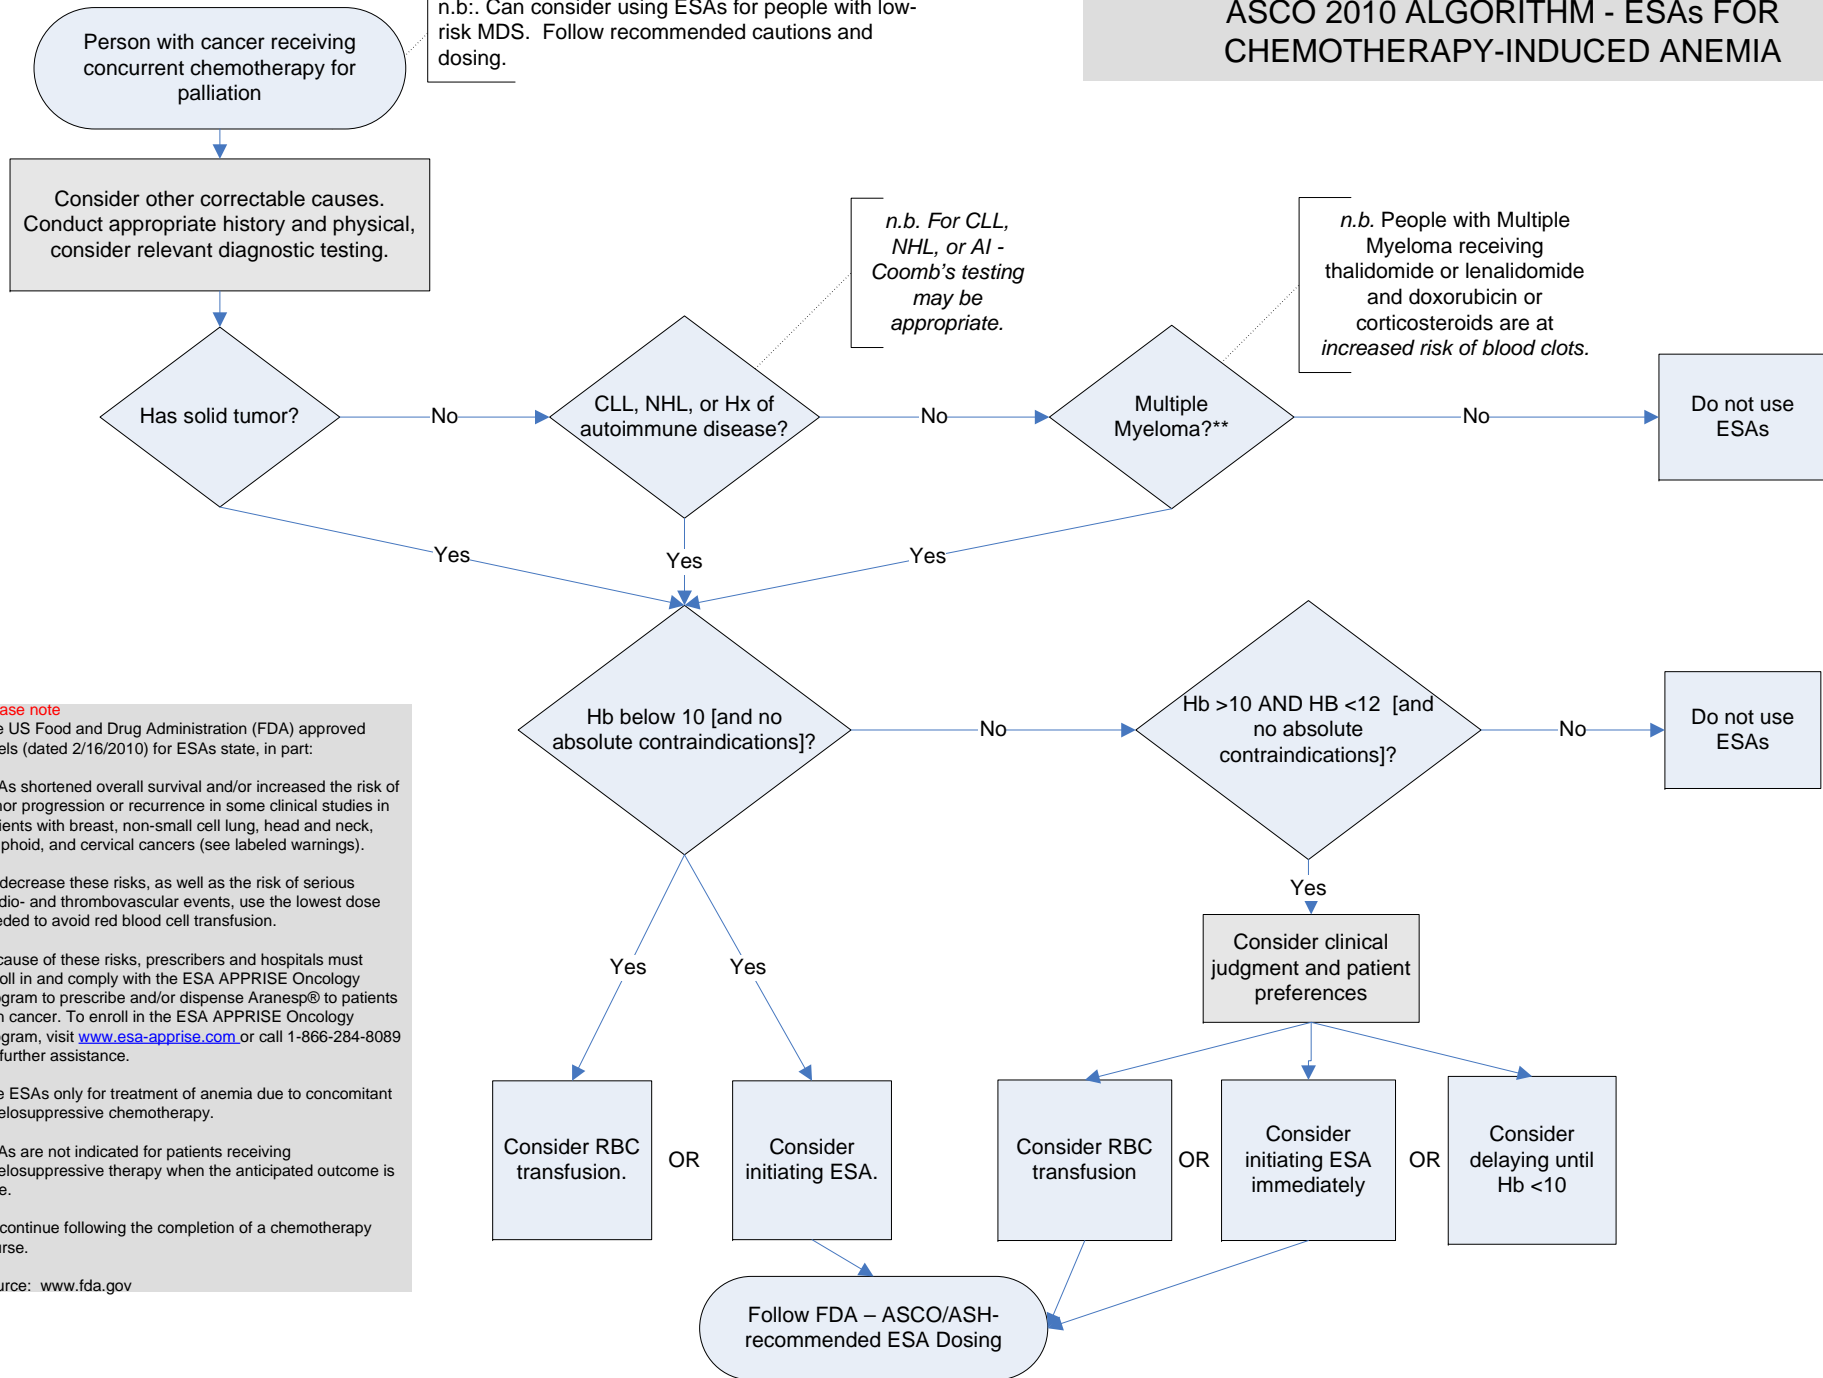

**Please note**  
 The US Food and Drug Administration (FDA) approved labels (dated 2/16/2010) for ESAs state, in part:

ESAs shortened overall survival and/or increased the risk of tumor progression or recurrence in some clinical studies in patients with breast, non-small cell lung, head and neck, lymphoid, and cervical cancers (see labeled warnings).

- To decrease these risks, as well as the risk of serious cardio- and thrombovascular events, use the lowest dose needed to avoid red blood cell transfusion.
- Because of these risks, prescribers and hospitals must enroll in and comply with the ESA APPRISE Oncology Program to prescribe and/or dispense Aranesp® to patients with cancer. To enroll in the ESA APPRISE Oncology Program, visit [www.esa-apprise.com](http://www.esa-apprise.com) or call 1-866-284-8089 for further assistance.
- Use ESAs only for treatment of anemia due to concomitant myelosuppressive chemotherapy.
- ESAs are not indicated for patients receiving myelosuppressive therapy when the anticipated outcome is cure.
- Discontinue following the completion of a chemotherapy course.

Source: [www.fda.gov](http://www.fda.gov)
